# Supplementary material for: Structural and functional characterisation of the entry point to pyocyanin biosynthesis in Pseudomonas aeruginosa defines a new 3-deoxy-d-arabino-heptulosonate 7-phosphate synthase subclass
Source: Oxford University Press journal article supplement (doi:10.1042/bsr20181605), 2018-09-21
Supplement: bsr20181605_supp1.pdf [file bsr20181605_supp1.pdf]

Structural and Functional Characterisation of the  
Entry Point to Pyocyanin Biosynthesis in  
*Pseudomonas aeruginosa* Defines a New 3-  
Deoxy-D-*arabino*-heptulosonate 7-phosphate  
Synthase Subclass

*Oliver W. Sterritt*<sup>1,2</sup>, *Eric J. M. Lang*<sup>1,#</sup>, *Sarah A. Kessans*<sup>1</sup>, *Timothy M. Ryan*<sup>3</sup>, *Borries Demeler*<sup>4</sup>, *Geoffrey B. Jameson*<sup>1,2,5,\*</sup> and *Emily J. Parker*<sup>1,2,6,\*</sup>

<sup>1</sup>Biomolecular Interaction Centre and School of Physical and Chemical Sciences, University of Canterbury, Christchurch 8041, New Zealand

<sup>2</sup>Maurice Wilkins Centre for Molecular Biodiscovery, University of Auckland 1142, New Zealand

<sup>3</sup>SAXS/WAXS, Australian Synchrotron/ANSTO, 800 Blackburn Road, Clayton, VIC 3168, Australia

<sup>4</sup>Department of Chemistry and Biochemistry, University of Lethbridge, Alberta T1K 3M4, Canada

<sup>5</sup>Institute of Fundamental Sciences and the Riddet Institute, Massey University, Palmerston North 4442, New Zealand

<sup>6</sup>Ferrier Research Institute, Victoria University of Wellington, Wellington 6012, New Zealand

<sup>#</sup>Present address: School of Chemistry, University of Bristol, Bristol BS8 1TS, United Kingdom

SUPPORTING INFORMATION

*MtuDAH7PS*  $\beta_0$   $\alpha_{0a}$   $\alpha_{0b}$

1 10 20 30 40 50

*MtuDAH7PS* MNWTVVDIPIDQLPSLPLPTD L R L R L D A A L A K P A A O O P T W P A D Q A A M A R T V L E S V P P V T  
*PaeDAH7PS\_PA2843* . . . . . M S Q S W S P E S W R A K P I Q O O P E Y P D A A E H T A R V E Q T L A G Y P P L V  
*PaeDAH7PS\_PA1901* . . . . . M D D L L Q R V R R C E A I O O P E W G D P S R T R D V Q A Y T R G S P A L I  
*SacDAH7PS* . . . . . M S R Y P F P G A G H D P L I A S M V A A L P A R O O P Q W E P S R T A P V H E R L A R E S F L V  
*PchDAH7PS* . . . . . M E D I L K R V L S C E A F O O P Q W S E P S Q T H D A Q A Y L R D S A S L I  
*SfuDAH7PS\_SFUL3326* . . . . . M D N V V S E I R L R P A I O O P D W P D A E R T E E V R R T L S G R R A L V  
*SfuDAH7PS\_SFUL5264* . . . . . M D I D V R D I S S R V A L O O P D W A D D P R T E V R A Q T A R H D A L V

*MtuDAH7PS*  $\alpha_{0c}$   $\beta_1$   $\alpha_1$

60 70 80 90 100 110

*MtuDAH7PS* V P S E I V R L Q E Q L A Q V A K G E A F L L Q G G D C A E T F M D N T E P H I R G N V R A L L Q M A V V L T Y G A S M  
*PaeDAH7PS\_PA2843* F A G E A R E L R R Q F A E V T A G R A F L L Q G G D C A E S F A E F S A A K I R D T F R V I L Q M A V V M T F A A G C  
*PaeDAH7PS\_PA1901* R A C D I L A L R A T L A R V A R G E A L V V Q G G C A E D M D H H A E N V A R K A V I E L L A G A L R L A G R R  
*SacDAH7PS* S Y T S V R E L R G L L A R A A E C E F C L I Q A G D C V E L T T E C E P C D V E R K V E M D D V L G D V M R T G S G L  
*PchDAH7PS* R Y E D I L V L R A T L A R V A A C E A M V I Q S G D C A E D M D E S T P D H V V R K A V I L L A G T F R I V T Q Q  
*SfuDAH7PS\_SFUL3326* R Y E D V R D L R Q I L A R V A R G E A Q V V Q G G C A E D P M E S S A G Y V A R K A A V I D L L A G A M K M A S H K  
*SfuDAH7PS\_SFUL5264* R A E D V R R L R A V L A R V A A G E A H L V L A G D C A E D P A E C T S S Y V A R K A A I D V L A G T L K M V T R R

*MtuDAH7PS*  $\beta_2$  TT

120 130 140 150 160 170

*MtuDAH7PS* P V V K V A R I A G O Y A K P R S A D I D . . . . . A L G L R S Y R G D M I N G F A P D A A A R E H D P S R L V R A Y A N A  
*PaeDAH7PS\_PA2843* P V V K V G R M A G O F A K P R S S G D E T Q N G V T L P A Y R G D I V N G I G F D E K S R V P D P E R L L Q A Y H Q S  
*PaeDAH7PS\_PA1901* P V I R V G R I A G O F A K P R S K P H E Q V G E Q T L P V Y R G D M V N G R E A H A E Q R A D P P O R I L C Y A A A  
*SacDAH7PS* P V V R V G R M A G O F A K P R S D D W E T V E G G R L P V F R G P V V N A P D A C E E A R T F P S R V I T G L E A A  
*PchDAH7PS* P V V R V G R I A G O F A K P R S N N N E R I G D V E L P V Y R G D M V N G R E A I C G R H Q H D A Q R L V R C Y S A A  
*SfuDAH7PS\_SFUL3326* P I V R I G R I A G O F A K P R S Q P V E Y V G G V E L P V Y R G H M V N S P E P A P K G R I P D P S R L L T C Y D A A  
*SfuDAH7PS\_SFUL5264* P V V R V G R M A G O F A K P R S S P T E R V C G Q E L P V F R G H M V N G P E P D P V E R A D P T R I L S C Y R A A

*MtuDAH7PS*  $\alpha_2$   $\alpha_{2a}$   $\alpha_{2b}$

180 190 200 210 220 230

*MtuDAH7PS* S A A M N I V R A L T S S G L A S I H L V H D W N R E F V R T S P A G A R Y E A L A T E I D R G I R F M S A C G V A D R  
*PaeDAH7PS\_PA2843* T A S L N L L R A F A Q G G F A D L H Q V H R W N L D F I A N S A L A E R Y Q O L A D R I D E T L A F M R A C G L D S A  
*PaeDAH7PS\_PA1901* R N I M R H L G W D A A S G . . . . .  
*SacDAH7PS* R C A V T A L D R L G R . . . . . G E  
*PchDAH7PS* R D I M Q H L G W K A S A S . . . . . Q  
*SfuDAH7PS\_SFUL3326* G E M M G H L G W H S T A R . . . . . E F  
*SfuDAH7PS\_SFUL5264* A A V M A G L G R L P S . . . . . G A

*MtuDAH7PS*  $\beta_3$   $\alpha_3$   $\beta_4$   $\alpha_4$

240 250 260 270 280 290

*MtuDAH7PS* . N L Q T A E I Y A S H E A L V L D Y E R A M L S L S D G D D G E P Q L F D L S A H T V W I G E R T R O I D C A H T A F  
*PaeDAH7PS\_PA2843* P Q L R E T S F F T A H E A L L N Y E A L T R R D . . . . . S I T C E W Y D C S A H M L W I G D R T R O I D C A H V E M  
*PaeDAH7PS\_PA1901* E . A N A S P V W T S H E M L L D Y E L S M R E D . . . . . E Q R R V Y L G S T H W P W I G E R T R O V D C A H V A L  
*SacDAH7PS* G A A P E E R V W T S H E A L L D Y E L P Q V R R H . . . . . T D C G S Y I A S T H W P W I G E R T R O A D A H V R L  
*PchDAH7PS* E Q L S G S P A W T S H E M L V L D Y E L P Q R R D . . . . . E Q C R V F L G S T H W P W I G E R T R O L T C A H V T L  
*SfuDAH7PS\_SFUL3326* G R A I D P P V W T S H E A L L D Y E L P M L R R D . . . . . E S G A R W L A S T H L P W I G E R T R A L D C A H V E L  
*SfuDAH7PS\_SFUL5264* P R Q I D P D V W T S H E A L L D Y E V P M L R R E . . . . . A G C Q L L I G S T H W P W I G E R T R O V E C A H V A L

*MtuDAH7PS*  $\beta_5$   $\alpha_5$   $\beta_6$   $\alpha_6$

300 310 320 330 340 350

*MtuDAH7PS* A Q V I A N P V G V K L G P N M T P E L A V E Y V E R L D P H N K P G R I T L V S R M G N H K V R D L L P P I V E K V Q  
*PaeDAH7PS\_PA2843* I R G V G N P I G V K V G S M D S E E L I R L I D I L N P D N D P G R I N L I V R M G A D K V G D H I P R L I Q A I Q  
*PaeDAH7PS\_PA1901* L A E V L N P V A C K V G P E I G R D Q L L A L C E R L D P R R E P G R I T L I A R M G A Q V G E R L P P I V E A V R  
*SacDAH7PS* M T E L D N P V A C K V G P E A T V D E V L D L C A V L D P H R T P G R I T L I A R F G A D R V A . A L A P L V R A V R  
*PchDAH7PS* I S E V I N P V A C K V G P D I T R D Q L L S L C E R L D S K R E P G R I T L I A R M G A Q V A D R L P P I V E A V R  
*SfuDAH7PS\_SFUL3326* F A S I A N P V A C K V G P S M T V A D L L G L C E R L D P D R E P G R I T L I S R M G A G A V G E R L P A L V A A V R  
*SfuDAH7PS\_SFUL5264* L A A V V N P V A C K V G P R M A P D E L V A L C A R L D P G R E P G R I T L I A R M G A G A V A G A L P P I V T A V R

*MtuDAH7PS*  $\beta_7$   $\alpha_7$   $\beta_8$

360 370 380 390 400 410

*MtuDAH7PS* A T C H Q V I W Q C D P M H G N T H E S S T G K T R H F D R I V D E V Q G F F E V H R A L G T H P G G I H V E I T G E  
*PaeDAH7PS\_PA2843* R E C R Q V I W S S D P M H G N T I K A S S G Y K T R D F A R V L A E V R Q F F E V H Q A E G S Y A G G I H F M T G Q  
*PaeDAH7PS\_PA1901* A A C H P V I W L S D P M H G N T I V A P C G N K T R L V R S I A E V A F R L A V S G S G V A A G L H L E T T P D  
*SacDAH7PS* Q A C H P V L W M C D P M H G N T V K T P D G L K T R R L D T I M S E I R Q C V D V L A E N G E R C A G L H L E A S P D  
*PchDAH7PS* Q A C H K I I W L S D P M H G N T I V A P C G N K T R M V Q A I T E I T A F K H A V T S A G G V A A G L H L E T T P D  
*SfuDAH7PS\_SFUL3326* A A C H P V S W L C D P M H G N T V T T G E G L K T R Y L E H V E R E V R G F L T A V R S A D G T A G G I H L E T T P E  
*SfuDAH7PS\_SFUL5264* E A C H P V I W L T D P M H G N T V T T A T G V K T R F V E T V V E E V R Q F Q L A V R Q A G G V A G L H L E A T P D

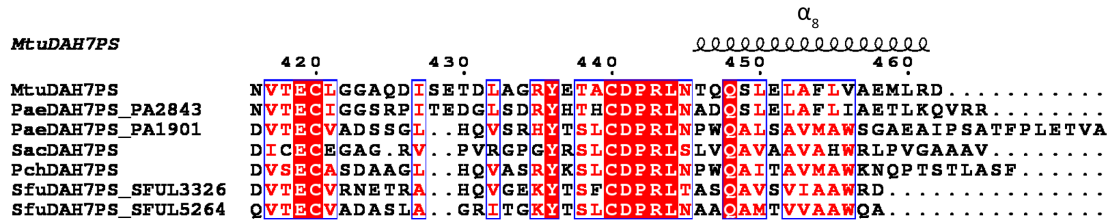

**Figure S1: Sequence Alignment among the type II DAH7PSs, indicating the relative positions of  $\beta$  strands and  $\alpha$  helices based on MtuDAH7PS (PDB 2B7O). Mtu, *Mycobacterium tuberculosis*; Pae\_PA2843, *Pseudomonas aeruginosa*; Pae\_PA1901, *Pseudomonas aeruginosa*; Sac, *Streptomyces achromogenes*; Pch, *Pseudomonas chlororaphis*; Sfu\_SFUL3326, *Streptomyces fulvissimus*; Sfu\_SFUL5264, *Streptomyces fulvissimus*.**

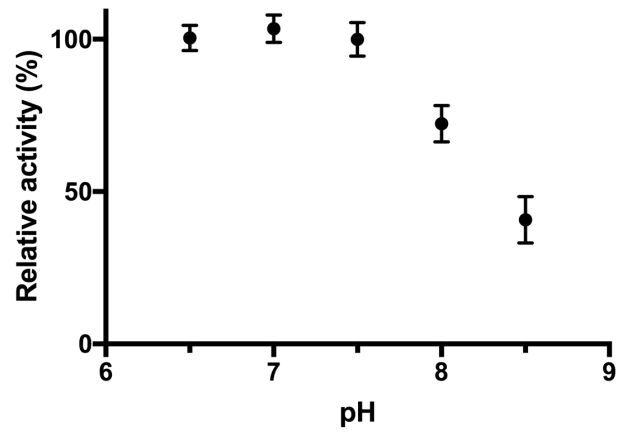

**Figure S2: Activity of *PaeDAH7PS*<sup>PA1901</sup> measured at a range of pH, relative to the activity observed at pH 7.5, indicates that this enzyme is active over a range of pH between pH 6.5 and 7.5. Substrate concentrations were held at 150  $\mu$ M each for PEP and E4P.**

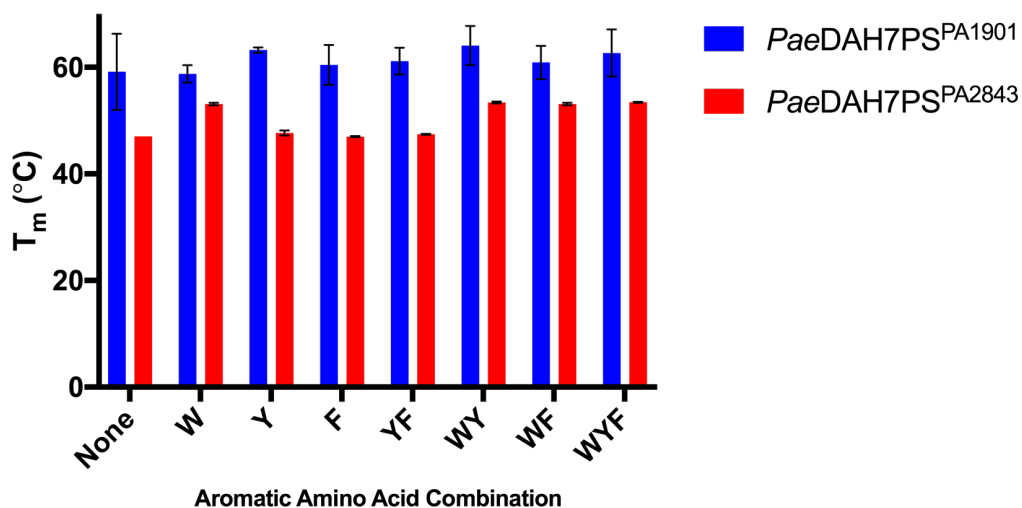

**Figure S3:** The melting temperature of *PaeDAH7PS*<sup>PA1901</sup> and comparison to that previously reported for *PaeDAH7PS*<sup>PA2843</sup> [1] in the presence of various combinations of aromatic amino acids. Each single letter code corresponds to 200  $\mu$ M of the appropriate amino acid.

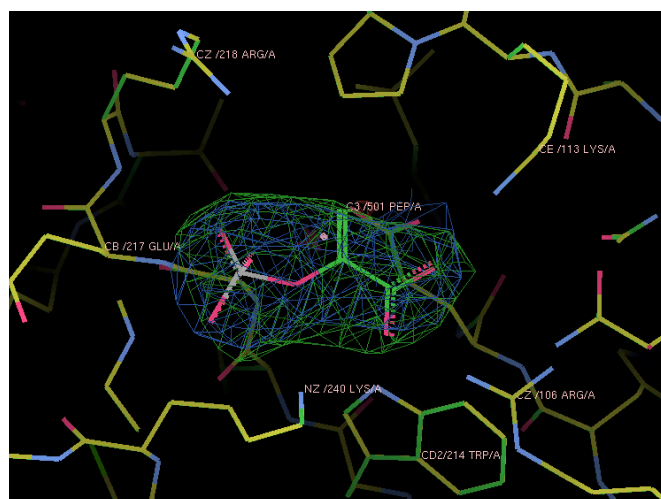

**Figure S4:** Electron density omit maps for PEP at the active site of *PaeDAH7PS*<sup>PA1901</sup> (PDB **6BMC**). 2FoI-FcI is represented by the blue mesh contoured at 1.5  $\sigma$  and FoI-FcI is represented by the green mesh contoured at 3  $\sigma$ .

**Table S1: SEC-SAXS sample and data collection parameters.**

| <b>Sample Details</b>                        | <b><i>PaeDAH7PS</i><sup>PA1901</sup></b>                                                  |
|----------------------------------------------|-------------------------------------------------------------------------------------------|
| Organism                                     | <i>Pseudomonas aeruginosa</i>                                                             |
| UniProt sequence ID                          | G3XCJ9                                                                                    |
| Extinction coefficient [ $A_{280}$ , 0.1 %]  | 1.22                                                                                      |
| $M$ from chemical composition (Da)           | 44, 468                                                                                   |
| SEC-SAXS column                              | 5 x 150 mm, Superdex S200                                                                 |
| Loading concentration (mg mL <sup>-1</sup> ) | 1.0, 5.0 or 8.0                                                                           |
| Injection volume ( $\mu$ L)                  | 20                                                                                        |
| Flow rate (mL min <sup>-1</sup> )            | 0.2                                                                                       |
| Solvent                                      | 50 mM bis-Tris propane pH 7.5, 100 $\mu$ M cobalt chloride, 200 $\mu$ M PEP, 5 % glycerol |
| <b>SAXS data collection parameters</b>       |                                                                                           |
| Instrument                                   | Australian synchrotron SAXS/WAXS beamline                                                 |
| Detector                                     | Dectris PILATUS 1M                                                                        |
| Sample environment                           | SEC-SAXS with sheath-flow cell                                                            |
| Wavelength ( $\text{\AA}$ )                  | 1.0332                                                                                    |
| Camera length (mm)                           | 1600                                                                                      |
| Set temperature ( $^{\circ}$ C)              | 20                                                                                        |

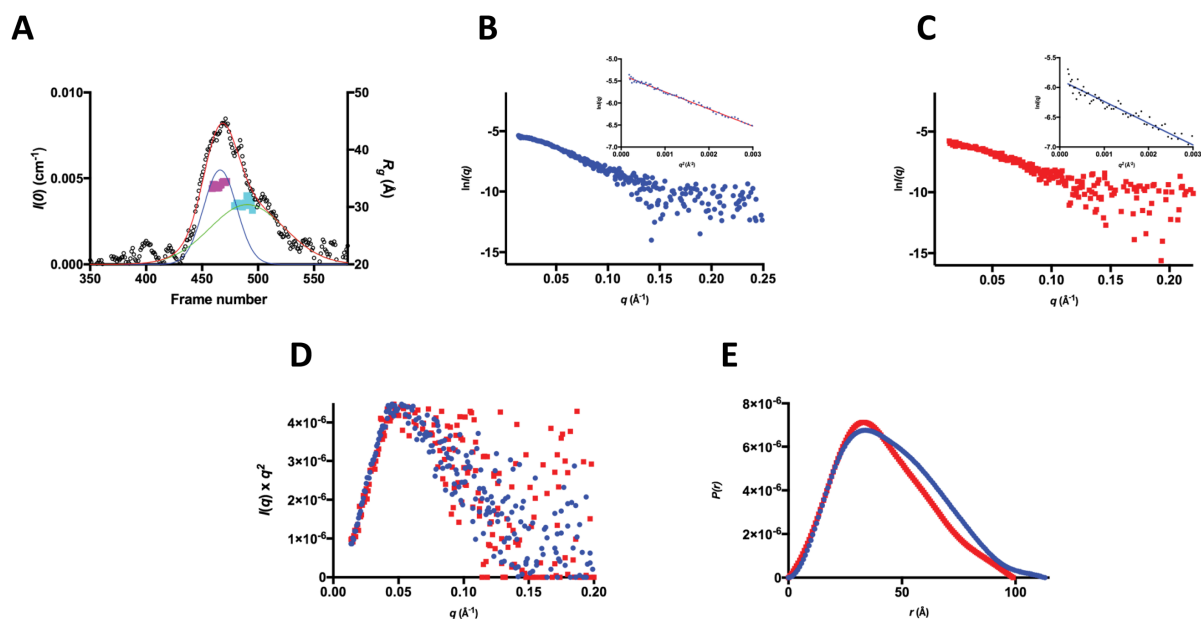

**Figure S5: SEC-SAXS analysis for *PaeDAH7PS*<sup>PA1901</sup> from the 5.0 mg/mL SEC-input concentration.** (A) Deconvolution of the SEC-SAXS data indicates two Gaussian components (peak A, blue line and peak B, green line. Sum, red line). The  $R_g$  values across each peak are indicated as magenta or cyan squares respectively. (B) – (C) the SAXS profiles for the deconvoluted data peak A and peak B respectively. Guinier plots are inset. (D) Kratky plots of the deconvoluted data in (B) and (C) (peak A, blue circles and peak B, red squares). (E)  $P(r)$  plots for the deconvoluted data in (B) and (C) (peak A, blue circles and peak B, red squares).



**Table S2: SEC-SAXS parameters determined for *PaeDAH7PS*<sup>PA1901</sup> from the 5.0 mg/mL SEC-input concentration.**

|                                               | 5.0 mg/mL Peak A    | 5.0 mg/mL Peak B    |
|-----------------------------------------------|---------------------|---------------------|
| <b><i>Guinier Analysis</i></b>                |                     |                     |
| $R_g$ (Å)                                     | $34.0 \pm 1.6$      | $32.0 \pm 3.8$      |
| $I(0)$ (cm <sup>-1</sup> )                    | $0.004 \pm 5e^{-5}$ | $0.004 \pm 1e^{-4}$ |
| $q_{\min}$                                    | 0.013               | 0.013               |
| Correlation coefficient, $r^2$                | 0.992               | 0.928               |
| <b><i>Pair Wise Distribution Analysis</i></b> |                     |                     |
| $R_g$ (Å)                                     | 35.25               | 32.5                |
| $I(0)$ (cm <sup>-1</sup> )                    | 0.00                | 0.00                |
| $d_{\max}$ (Å)                                | 113.1               | 99.0                |
| $V_p$ (Å <sup>3</sup> )                       | 167,000             | 126,000             |
| $q$ range (Å <sup>-1</sup> )                  | 0.013 – 0.25        | 0.013 – 0.25        |

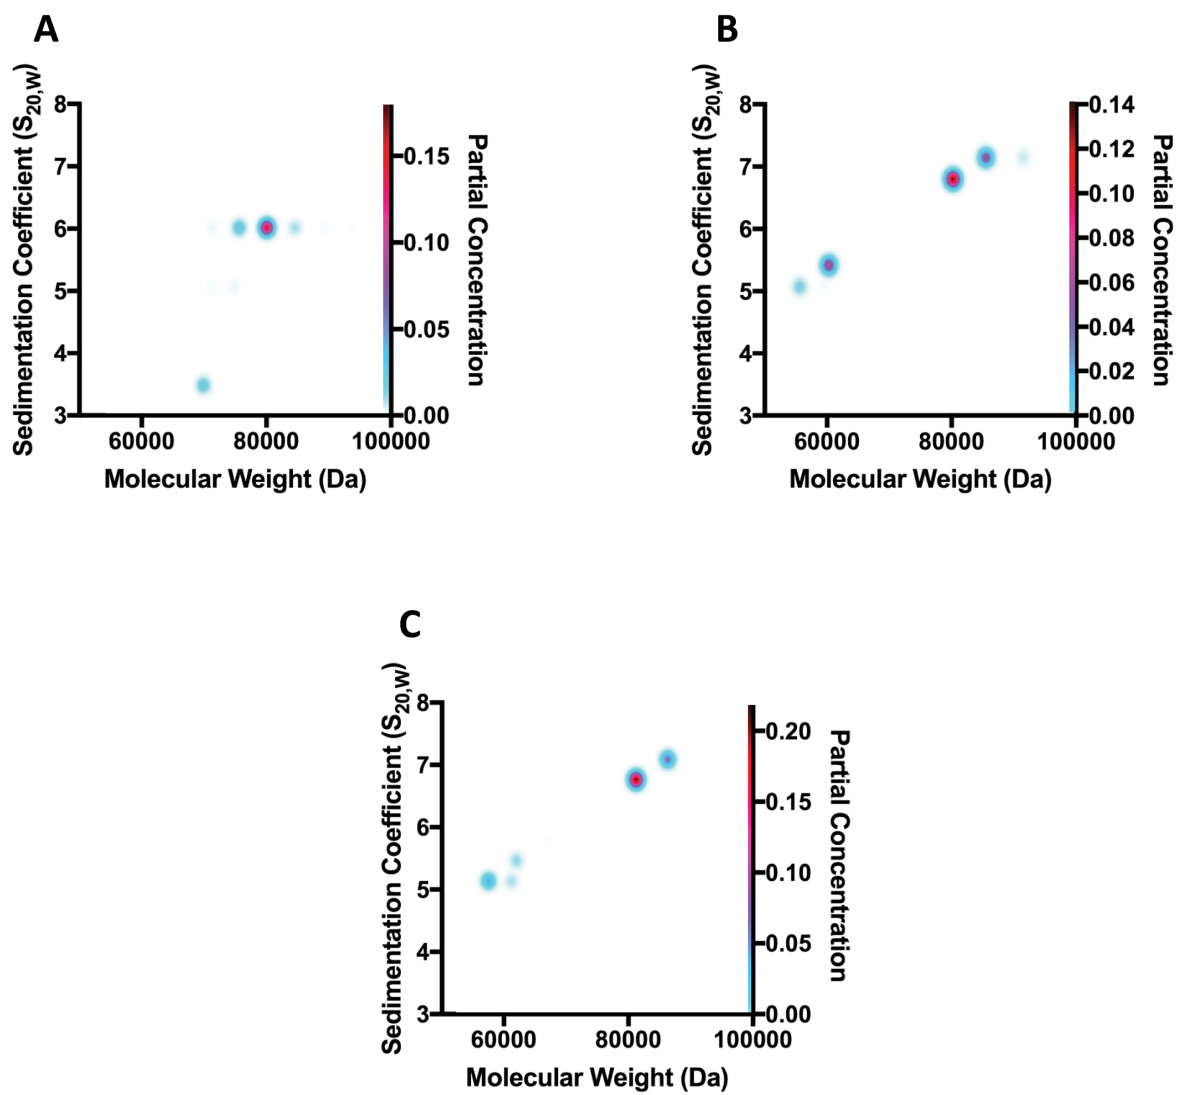

**Figure S6: Pseudo-3D plots for distributions of the 2DSA Monte Carlo results shown in Figure 10 for (A) 8  $\mu$ M, (B) 23  $\mu$ M, and (C) 30  $\mu$ M concentrations of *PaeDAH7PS*<sub>PA1901</sub>.**

**Table S3: RMSD values obtained for the alignment between the structures of *PaeDAH7PS*<sup>PA1901</sup> and either *PaeDAH7PS*<sup>PA2843</sup> or *MtuDAH7PS*.**

| Alignment between         |              | RMSD (Å) |
|---------------------------|--------------|----------|
| Single chain              |              |          |
| 6BMC_chain A              | 5UXO         | 0.816    |
| 6BMC_chain A              | 5UXN         | 0.830    |
| 6BMC_chain A              | 5UXM         | 0.822,   |
| 6BMC_chain A              | 2B7O_Chain A | 0.775    |
| 6BMC_chain A              | 2B7O_Chain B | 0.821    |
| 6BMC_chain B              | 5UXO         | 0.816    |
| 6BMC_Chain B              | 5UXN         | 0.817    |
| 6BMC_chain B              | 5UXM         | 0.840    |
| 6BMC_chain B              | 2B7O_Chain A | 0.754    |
| 6BMC_chain B              | 2B7O_Chain B | 0.776    |
| Crystallographic Dimer    |              |          |
| 6BMC                      | 5UXO         | 25.740   |
| 6BMC                      | 5UXN         | 26.020   |
| 6BMC                      | 5UXM         | 26.100   |
| 6BMC                      | 2B7O         | 25.100   |
| Crystallographic Tetramer |              |          |
| 6BMC                      | 5UXO         | 27.850   |
| 6BMC                      | 5UXN         | 28.610   |
| 6BMC                      | 5UXM         | 28.800   |
| 6BMC                      | 2B7O         | 34.460   |

## References

1. Sterritt OW, Kessans, S. A., Jameson, G. B., Parker, E. J. A Pseudoisostructural Type II DAH7PS Enzymes from *Pseudomonas aeruginosa*: alternative evolutionary strategies to control shikimate pathway flux. *Biochemistry*. 2018;57(18):2667 - 78.
